# Supplementary material for: The Learning Crisis: Three Years after COVID-19
Source: Research Square preprint supplement (doi:10.21203/rs.3.rs-6566438/v1), 2025-06-03
Supplement: Supplementary file 1 [file a7b412b8aa5c62522c30ed96.docx]

**Annex A. Summary statistics for TIMSS participation and weeks of school closures**

Table A1. Country Information for Grade 4 Population

| Country | Cycles of Data | Weeks of School Closure | # Students |
| --- | --- | --- | --- |
| Albania | 2019, 2023 | 29 | 6,297 |
| Armenia | 2003, 2007, 2011, 2015, 2019, 2023 | 12 | 25,685 |
| Australia | 2003, 2007, 2011, 2015, 2019, 2023 | 46 | 30,931 |
| Azerbaijan, Republic of | 2011, 2019, 2023 | 49 | 15,616 |
| Bahrain | 2011, 2015, 2019, 2023 | 77 | 18,842 |
| Belgium (Flemish) | 2003, 2011, 2015, 2019, 2023 | 29 | 23,507 |
| Belgium (French) | 2023 | 29 | 4,818 |
| Bosnia and Herzegovina | 2019, 2023 | 49 | 3,253 |
| Brazil | 2023 | 79 | 21,353 |
| Bulgaria | 2015, 2019, 2023 | 48 | 12,469 |
| Canada | 2015, 2019, 2023 | 51 | 37,427 |
| Chile | 2011, 2015, 2019, 2023 | 69 | 18,492 |
| Cyprus | 2003, 2015, 2019, 2023 | 27 | 17,120 |
| Czech Republic | 2007, 2011, 2015, 2019, 2023 | 46 | 25,058 |
| Denmark | 2007, 2011, 2015, 2019, 2023 | 35 | 19,092 |
| England | 2003, 2007, 2011, 2015, 2019, 2023 | 27 | 21,860 |
| Finland | 2011, 2015, 2019, 2023 | 33 | 19,968 |
| France | 2015, 2019, 2023 | 12 | 13,178 |
| Georgia | 2007, 2011, 2015, 2019, 2023 | 35 | 20,183 |
| Germany | 2007, 2011, 2015, 2019, 2023 | 38 | 18,498 |
| Hungary | 2003, 2007, 2011, 2015, 2019, 2023 | 39 | 26,979 |
| Iran, Islamic Republic of | 2003, 2007, 2011, 2015, 2019, 2023 | 77 | 29,365 |
| Ireland | 2011, 2015, 2019, 2023 | 25 | 17,636 |
| Italy | 2003, 2007, 2011, 2015, 2019, 2023 | 38 | 25,135 |
| Japan | 2003, 2007, 2011, 2015, 2019, 2023 | 12 | 25,309 |
| Jordan | 2023 | 54 | 5,926 |
| Kazakhstan | 2007, 2011, 2015, 2019, 2023 | 52 | 15,335 |
| Korea, Republic of | 2011, 2015, 2019, 2023 | 80 | 17,196 |
| Kuwait | 2007, 2011, 2015, 2019, 2023 | 79 | 11,466 |
| Latvia | 2003, 2007, 2019, 2023 | 48 | 12,305 |
| Lithuania | 2003, 2007, 2011, 2015, 2019, 2023 | 38 | 25,304 |
| Montenegro | 2019, 2023 | 56 | 9,196 |
| Morocco | 2003, 2007, 2011, 2015, 2019, 2023 | 38 | 26,005 |
| Netherlands | 2003, 2007, 2011, 2015, 2019, 2023 | 31 | 20,262 |
| New Zealand | 2003, 2007, 2011, 2015, 2019, 2023 | 27 | 30,605 |
| North Macedonia | 2019, 2023 | 54 | 7,611 |
| Norway | 2003, 2007, 2011, 2015, 2019, 2023 | 29 | 13,111 |
| Oman | 2011, 2015, 2019, 2023 | 66 | 33,025 |
| Poland | 2011, 2015, 2019, 2023 | 45 | 14,171 |
| Portugal | 2011, 2015, 2019, 2023 | 24 | 18,026 |
| Qatar | 2007, 2011, 2015, 2019, 2023 | 60 | 19,434 |
| Romania | 2011, 2023 | 36 | 8,026 |
| Saudi Arabia | 2011, 2015, 2019, 2023 | 69 | 18,971 |
| Serbia | 2011, 2015, 2019, 2023 | 50 | 16,875 |
| Singapore | 2003, 2007, 2011, 2015, 2019, 2023 | 17 | 36,943 |
| Slovak Republic | 2007, 2011, 2015, 2019, 2023 | 38 | 25,080 |
| Slovenia | 2003, 2007, 2011, 2015, 2023 | 47 | 16,349 |
| South Africa | 2019, 2023 | 64 | 20,362 |
| Spain | 2011, 2015, 2019, 2023 | 15 | 31,280 |
| Sweden | 2007, 2011, 2015, 2019, 2023 | 24 | 22,119 |
| Türkiye | 2011, 2015, 2019, 2023 | 50 | 4,503 |
| United Arab Emirates | 2011, 2015, 2019, 2023 | 66 | 93,057 |
| United States | 2003, 2007, 2011, 2015, 2019, 2023 | 77 | 56,070 |
| Uzbekistan | 2023 | 14 | 4,401 |

Table A2. Country Information for Grade 8 Population

| Country | Cycles of Data | Weeks of School Closure | # Students |
| --- | --- | --- | --- |
| Australia | 1999, 2003, 2007, 2011, 2015, 2019, 2023 | 46 | 42,773 |
| Austria | 2023 | 40 | 4,604 |
| Azerbaijan, Republic of | 2023 | 49 | 5,981 |
| Bahrain | 2003, 2007, 2011, 2015, 2019, 2023 | 77 | 28,561 |
| Brazil | 2023 | 79 | 22,485 |
| Chile | 1999, 2003, 2011, 2015, 2019, 2023 | 69 | 30,281 |
| Cyprus | 1999, 2003, 2007, 2019, 2023 | 27 | 18,694 |
| Czech Republic | 1999, 2007, 2023 | 46 | 16,097 |
| England | 1999, 2003, 2007, 2011, 2015, 2019, 2023 | 27 | 25,212 |
| Finland | 1999, 2011, 2019, 2023 | 33 | 14,821 |
| France | 2019, 2023 | 12 | 8,186 |
| Georgia | 2007, 2011, 2015, 2019, 2023 | 35 | 20,757 |
| Hungary | 1999, 2003, 2007, 2011, 2015, 2019, 2023 | 39 | 29,612 |
| Iran, Islamic Republic of | 1999, 2003, 2007, 2011, 2015, 2019, 2023 | 77 | 38,352 |
| Ireland | 2015, 2019, 2023 | 25 | 13,602 |
| Israel | 1999, 2003, 2007, 2011, 2015, 2019, 2023 | 32 | 18,963 |
| Italy | 1999, 2003, 2007, 2011, 2015, 2019, 2023 | 38 | 28,422 |
| Côte d’Ivoire | 2023 | 13 | 8,131 |
| Japan | 1999, 2003, 2007, 2011, 2015, 2019, 2023 | 12 | 30,994 |
| Jordan | 1999, 2003, 2007, 2011, 2015, 2019, 2023 | 54 | 43,940 |
| Kazakhstan | 2011, 2015, 2019, 2023 | 52 | 15,096 |
| Korea, Republic of | 1999, 2003, 2007, 2011, 2015, 2019, 2023 | 80 | 34,150 |
| Kuwait | 2007, 2015, 2019, 2023 | 79 | 12,825 |
| Lithuania | 1999, 2003, 2007, 2011, 2015, 2019, 2023 | 38 | 28,677 |
| Malaysia | 1999, 2003, 2007, 2011, 2015, 2019, 2023 | 70 | 46,534 |
| Malta | 2007, 2015, 2023 | 21 | 12,361 |
| Morocco | 1999, 2003, 2007, 2011, 2015, 2019, 2023 | 38 | 37,198 |
| New Zealand | 1999, 2003, 2011, 2015, 2019, 2023 | 27 | 30,189 |
| Norway | 2003, 2007, 2011, 2015, 2019, 2023 | 29 | 15,008 |
| Oman | 2007, 2011, 2015, 2019, 2023 | 66 | 37,399 |
| Palestinian National Authority | 2003, 2007, 2011, 2023 | 59 | 23,630 |
| Portugal | 2019, 2023 | 24 | 8,701 |
| Qatar | 2007, 2011, 2015, 2019, 2023 | 60 | 17,816 |
| Romania | 1999, 2003, 2007, 2011, 2019, 2023 | 36 | 24,913 |
| Saudi Arabia | 2003, 2007, 2011, 2015, 2019, 2023 | 69 | 19,363 |
| Singapore | 1999, 2003, 2007, 2011, 2015, 2019, 2023 | 17 | 37,197 |
| South Africa | 1999, 2003, 2011, 2015, 2019, 2023 | 64 | 54,862 |
| Sweden | 2003, 2007, 2011, 2015, 2019, 2023 | 24 | 27,514 |
| Türkiye | 1999, 2007, 2011, 2015, 2019, 2023 | 50 | 4,835 |
| United Arab Emirates | 2011, 2015, 2019, 2023 | 66 | 31,718 |
| United States | 1999, 2003, 2007, 2011, 2015, 2019, 2023 | 77 | 61,239 |
| Uzbekistan | 2023 | 14 | 4,307 |

**Annex B. Robustness checks**

We perform several robustness checks to ensure that the results are robust to regression specifications and sample choice and are not obtained by chance. First, we conduct placebo tests to check if we detect a significant departure from the linear trend only in 2023. We run a similar regression model for the years 1999-2019 (grade 8) and 2003-2019 (grade 4), but estimate the departure from the linear trend for different TIMSS rounds. Figure B1 shows the results separately for each grade and subject. Overall, while departures from the linear trend are also detected in single cases for other years, only the 2023 departure is consistently negative across both subjects and grades. In grade 4 mathematics, the results indicate departures from the linear time trend in 2003 and 2019, but the departure in 2023 is twice as large. For grade 8 mathematics, the departure was significantly below zero only in 2023. In science, the 2023 departure is significant and negative, but the 2007 and 2019 data are also below the long-term trend. In grade 8 science, the 2023 results stand out, showing the largest departure from the linear time trend.

Figure B1. Placebo tests

Further robustness checks are related to regression specifications and sample selection (see Table B1-B3). First, we estimate the same models but without any control variables. The results were almost identical to those obtained for the main specification. Second, we estimate the same models but with weights representing the student population. In the main specification, we use senate weights, which equalize each country's contribution to the final estimate. The results were even more negative when considering other countries as a representation of the student population rather by weighting each country equally.

Finally, we estimate the same models as in the main specification but using shorter time spans and also considering countries with data available in all TIMSS rounds. Considering shorter time trends does not alter the main conclusions. The results are highly similar across years, although for shorter time spans, the standard errors increase, showing a decreasing reliability of the results when estimated on shorter periods of time and smaller sample size.

Table B1. The main result obtained with different regression specifications

|  | Mathematics | | | | | |
| --- | --- | --- | --- | --- | --- | --- |
|  | Grade 4 | | | Grade 8 | | |
|  | main specification | no controls | total weight (population estimate) | main specification | no controls | total weight (population estimate) |
| 2023 departure from the time trend | -9.31*** | -8.18*** | -16.78*** | -11.23*** | -11.51*** | -17.31*** |
| (0.89) | (0.87) | (1.82) | (1.26) | (1.25) | (2.34) |
| N | 1350336 | 1398675 | 1350336 | 1473698 | 1506087 | 1473698 |
|  | Science | | | | | |
|  | Grade 4 | | | Grade 8 | | |
|  | main specification | no controls | total weight (population estimate) | main specification | no controls | total weight (population estimate) |
| 2023 departure from the time trend | -4.88*** | -4.83*** | -6.35*** | -12.83*** | -13.23*** | -16.82*** |
| (0.91) | (0.89) | (1.76) | (1.28) | (1.27) | (2.20) |
| N | 1350336 | 1398675 | 1350336 | 1472762 | 1505147 | 1472762 |

Table B2. The main result obtained for different time spans

|  | Mathematics | | | | | | | | | |
| --- | --- | --- | --- | --- | --- | --- | --- | --- | --- | --- |
|  | Grade 4 | | | | | Grade 8 | | | | |
|  | 2003-2023 | 2007-2023 | 2011-2023 | 2015-2023 | 1999-2023 | | 2003-2023 | 2007-2023 | 2011-2023 | 2015-2023 |
| 2023 departure from the time trend | -9.31*** | -8.59*** | -6.88*** | -3.22* | -11.23*** | | -13.24*** | -16.06*** | -15.70*** | -16.72*** |
| (0.89) | (0.95) | (1.02) | (1.34) | (1.26) | | (1.32) | (1.41) | (1.60) | (2.10) |
| N | 1398675 | 1290330 | 1155686 | 905999 | 1506087 | | 1357923 | 1158061 | 963771 | 726903 |
| N countries | 78 | 77 | 71 | 66 | 74 | | 74 | 67 | 59 | 52 |
| N | 1350336 | 1245577 | 1114168 | 876458 | 1473698 | | 1334277 | 1138580 | 946496 | 712363 |
|  | science | | | | | | | | | |
|  | Grade 4 | | | | | Grade 8 | | | | |
|  | 2003-2023 | 2007-2023 | 2011-2023 | 2015-2023 | 1999-2023 | | 2003-2023 | 2007-2023 | 2011-2023 | 2015-2023 |
| 2023 departure from the time trend | -4.88*** | -3.96*** | -3.28** | -1.97 | -12.83*** | | -12.60*** | -14.45*** | -15.66*** | -17.04*** |
| (0.91) | (0.98) | (1.07) | (1.38) | (1.28) | | (1.31) | (1.42) | (1.56) | (2.06) |
| N | 1398675 | 1290330 | 1155686 | 905999 | 1505147 | | 1356983 | 1157121 | 963771 | 726903 |
| N countries | 78 | 77 | 71 | 66 | 74 | | 74 | 67 | 59 | 52 |

Table B3. The main result obtained for different time spans and considering only the countries with data from all TIMSS rounds in a particular time span

|  | Mathematics | | | | | | | | | |
| --- | --- | --- | --- | --- | --- | --- | --- | --- | --- | --- |
|  | Grade 4 | | | | | Grade 8 | | | | |
|  | 2003-2023 | 2007-2023 | 2011-2023 | 2015-2023 | 1999-2023 | | 2003-2023 | 2007-2023 | 2011-2023 | 2015-2023 |
| 2023 departure from the time trend | -8.63*** | -7.77*** | -3.48** | -3.20* | -10.82*** | | -13.87*** | -18.07*** | -17.62*** | -16.59*** |
| (1.45) | (1.25) | (1.09) | (1.34) | (1.73) | | (1.67) | (1.72) | (1.74) | (2.09) |
| N | 377631 | 447600 | 752036 | 687516 | 468729 | | 507443 | 488400 | 598575 | 492040 |
| N countries | 13 | 19 | 34 | 41 | 13 | | 16 | 18 | 25 | 28 |
|  | Science | | | | | | | | | |
|  | Grade 4 | | | | | Grade 8 | | | | |
|  | 2003-2023 | 2007-2023 | 2011-2023 | 2015-2023 | 1999-2023 | | 2003-2023 | 2007-2023 | 2011-2023 | 2015-2023 |
| 2023 departure from the time trend | 1.78 | 1.05 | -0.3 | -1.96 | -8.55*** | | -7.91*** | -11.37*** | -16.46*** | -16.90*** |
| (1.39) | (1.23) | (1.14) | (1.38) | (1.66) | | (1.60) | (1.67) | (1.69) | (2.06) |
| N | 377631 | 447600 | 752036 | 687516 | 468729 | | 507443 | 488400 | 598575 | 492040 |
| N countries | 13 | 19 | 34 | 41 | 13 | | 16 | 18 | 25 | 28 |

**Annex B. Robustness checks**

We perform several robustness checks to ensure that the results are robust to regression specifications and sample choice and are not obtained by chance. First, we conduct placebo tests to check if we detect a significant departure from the linear trend only in 2023. We run a similar regression model for the years 1999-2019 (grade 8) and 2003-2019 (grade 4), but estimate the departure from the linear trend for different TIMSS rounds. Figure B1 shows the results separately for each grade and subject. Overall, while departures from the linear trend are also detected in single cases for other years, only the 2023 departure is consistently negative across both subjects and grades. In grade 4 mathematics, the results indicate departures from the linear time trend in 2003 and 2019, but the departure in 2023 is twice as large. For grade 8 mathematics, the departure was significantly below zero only in 2023. In science, the 2023 departure is significant and negative, but the 2007 and 2019 data are also below the long-term trend. In grade 8 science, the 2023 results stand out, showing the largest departure from the linear time trend.

Figure B1. Placebo tests

Further robustness checks are related to regression specifications and sample selection (see Table B1-B3). First, we estimate the same models but without any control variables. The results were almost identical to those obtained for the main specification. Second, we estimate the same models but with weights representing the student population. In the main specification, we use senate weights, which equalize each country's contribution to the final estimate. The results were even more negative when considering other countries as a representation of the student population rather by weighting each country equally.

Finally, we estimate the same models as in the main specification but using shorter time spans and also considering countries with data available in all TIMSS rounds. Considering shorter time trends does not alter the main conclusions. The results are highly similar across years, although for shorter time spans, the standard errors increase, showing a decreasing reliability of the results when estimated on shorter periods of time and smaller sample size.

Table B1. The main result obtained with different regression specifications

|  | Mathematics | | | | | |
| --- | --- | --- | --- | --- | --- | --- |
|  | Grade 4 | | | Grade 8 | | |
|  | main specification | no controls | total weight (population estimate) | main specification | no controls | total weight (population estimate) |
| 2023 departure from the time trend | -9.31*** | -8.18*** | -16.78*** | -11.23*** | -11.51*** | -17.31*** |
| (0.89) | (0.87) | (1.82) | (1.26) | (1.25) | (2.34) |
| N | 1350336 | 1398675 | 1350336 | 1473698 | 1506087 | 1473698 |
|  | Science | | | | | |
|  | Grade 4 | | | Grade 8 | | |
|  | main specification | no controls | total weight (population estimate) | main specification | no controls | total weight (population estimate) |
| 2023 departure from the time trend | -4.88*** | -4.83*** | -6.35*** | -12.83*** | -13.23*** | -16.82*** |
| (0.91) | (0.89) | (1.76) | (1.28) | (1.27) | (2.20) |
| N | 1350336 | 1398675 | 1350336 | 1472762 | 1505147 | 1472762 |

Table B2. The main result obtained for different time spans

|  | Mathematics | | | | | | | | | |
| --- | --- | --- | --- | --- | --- | --- | --- | --- | --- | --- |
|  | Grade 4 | | | | | Grade 8 | | | | |
|  | 2003-2023 | 2007-2023 | 2011-2023 | 2015-2023 | 1999-2023 | | 2003-2023 | 2007-2023 | 2011-2023 | 2015-2023 |
| 2023 departure from the time trend | -9.31*** | -8.59*** | -6.88*** | -3.22* | -11.23*** | | -13.24*** | -16.06*** | -15.70*** | -16.72*** |
| (0.89) | (0.95) | (1.02) | (1.34) | (1.26) | | (1.32) | (1.41) | (1.60) | (2.10) |
| N | 1398675 | 1290330 | 1155686 | 905999 | 1506087 | | 1357923 | 1158061 | 963771 | 726903 |
| N countries | 78 | 77 | 71 | 66 | 74 | | 74 | 67 | 59 | 52 |
| N | 1350336 | 1245577 | 1114168 | 876458 | 1473698 | | 1334277 | 1138580 | 946496 | 712363 |
|  | science | | | | | | | | | |
|  | Grade 4 | | | | | Grade 8 | | | | |
|  | 2003-2023 | 2007-2023 | 2011-2023 | 2015-2023 | 1999-2023 | | 2003-2023 | 2007-2023 | 2011-2023 | 2015-2023 |
| 2023 departure from the time trend | -4.88*** | -3.96*** | -3.28** | -1.97 | -12.83*** | | -12.60*** | -14.45*** | -15.66*** | -17.04*** |
| (0.91) | (0.98) | (1.07) | (1.38) | (1.28) | | (1.31) | (1.42) | (1.56) | (2.06) |
| N | 1398675 | 1290330 | 1155686 | 905999 | 1505147 | | 1356983 | 1157121 | 963771 | 726903 |
| N countries | 78 | 77 | 71 | 66 | 74 | | 74 | 67 | 59 | 52 |

Table B3. The main result obtained for different time spans and considering only the countries with data from all TIMSS rounds in a particular time span

|  | Mathematics | | | | | | | | | |
| --- | --- | --- | --- | --- | --- | --- | --- | --- | --- | --- |
|  | Grade 4 | | | | | Grade 8 | | | | |
|  | 2003-2023 | 2007-2023 | 2011-2023 | 2015-2023 | 1999-2023 | | 2003-2023 | 2007-2023 | 2011-2023 | 2015-2023 |
| 2023 departure from the time trend | -8.63*** | -7.77*** | -3.48** | -3.20* | -10.82*** | | -13.87*** | -18.07*** | -17.62*** | -16.59*** |
| (1.45) | (1.25) | (1.09) | (1.34) | (1.73) | | (1.67) | (1.72) | (1.74) | (2.09) |
| N | 377631 | 447600 | 752036 | 687516 | 468729 | | 507443 | 488400 | 598575 | 492040 |
| N countries | 13 | 19 | 34 | 41 | 13 | | 16 | 18 | 25 | 28 |
|  | Science | | | | | | | | | |
|  | Grade 4 | | | | | Grade 8 | | | | |
|  | 2003-2023 | 2007-2023 | 2011-2023 | 2015-2023 | 1999-2023 | | 2003-2023 | 2007-2023 | 2011-2023 | 2015-2023 |
| 2023 departure from the time trend | 1.78 | 1.05 | -0.3 | -1.96 | -8.55*** | | -7.91*** | -11.37*** | -16.46*** | -16.90*** |
| (1.39) | (1.23) | (1.14) | (1.38) | (1.66) | | (1.60) | (1.67) | (1.69) | (2.06) |
| N | 377631 | 447600 | 752036 | 687516 | 468729 | | 507443 | 488400 | 598575 | 492040 |
| N countries | 13 | 19 | 34 | 41 | 13 | | 16 | 18 | 25 | 28 |
